# Supplementary material
Source: Springer Nature journal article supplement (https://www.springermedizin.de/resource/supplementary/10194_2012_255_MOESM1_ESM.pdf/9422550)

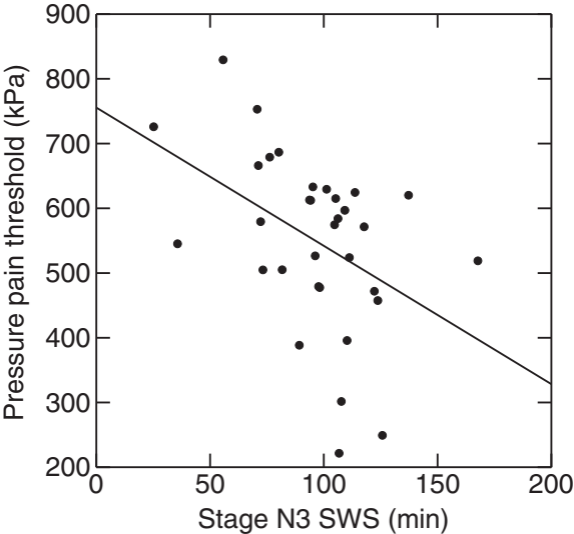

Supplement: MOESM1 [file 9422550]
